# Supplementary material for: In Silico Activity Prediction and Docking Studies of the Binding Mechanisms of Levofloxacin Structure Derivatives to Active Receptor Sites of Bacterial Type IIA Topoisomerases
Source: MDPI journal article supplement (doi:10.3390/scipharm92010001), 2023-12-20
Supplement: s1 [file s1]

# *In Silico* Activity Prediction and Docking Studies of the Binding Mechanisms of Levofloxacin Structure Derivatives to Active Receptor Sites of Bacterial Type IIA Topoisomerases

Elena V. Uspenskaya<sup>1\*</sup>, Vasilisa A. Sukhanova<sup>1</sup>, Ekaterina Kuzmina<sup>1</sup>, Tatyana V. Pleteneva<sup>1</sup>, Olga V. Levitskaya<sup>1</sup>, Timur M. Garaev<sup>2</sup>, Anton V. Syroeshkin<sup>1</sup>

**Table S1:** Formula for the (R) topological indice of a chemical graph G.

| Topological Index | Description                                                                                                                                                    | Formula of Topological Indices                                   |
|-------------------|----------------------------------------------------------------------------------------------------------------------------------------------------------------|------------------------------------------------------------------|
| Rouvray (R)       | The total sum of the distance is another topological index, which is twice the Index W.<br>Чем больше значение индекса, тем более связанной является молекула. | $R = \sum_{j=1}^A \cdot \sum_{i=1}^A d_{ji} = \sum_{i=1}^A = 2W$ |

## Ttribochemical procedure

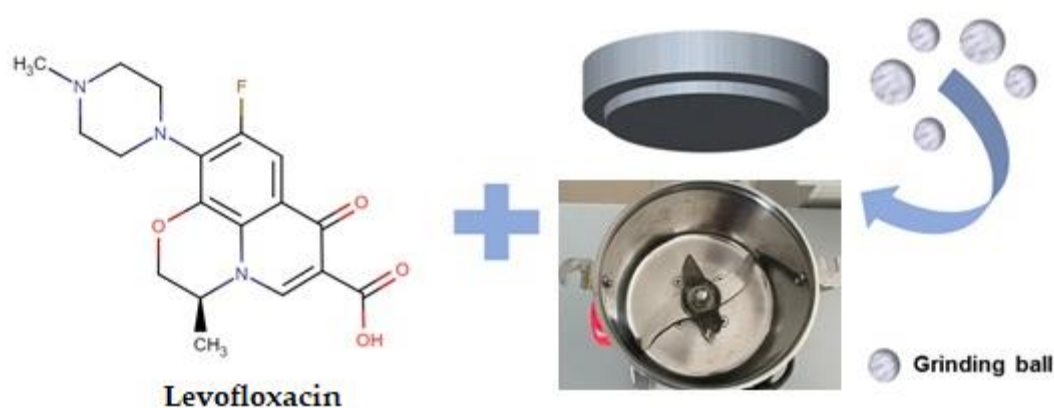

**Figure S1:** TrbCh method of RMS of Lvf.

## Supplementary Material

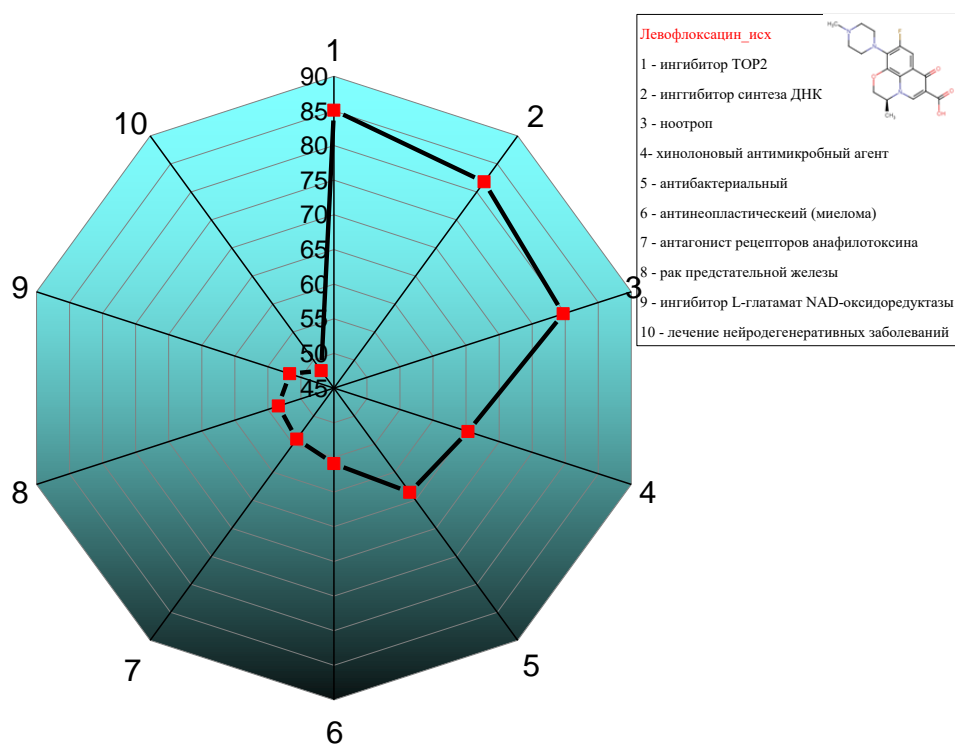

Figure S2: The PASS Soft results for Lvf's derivatives.

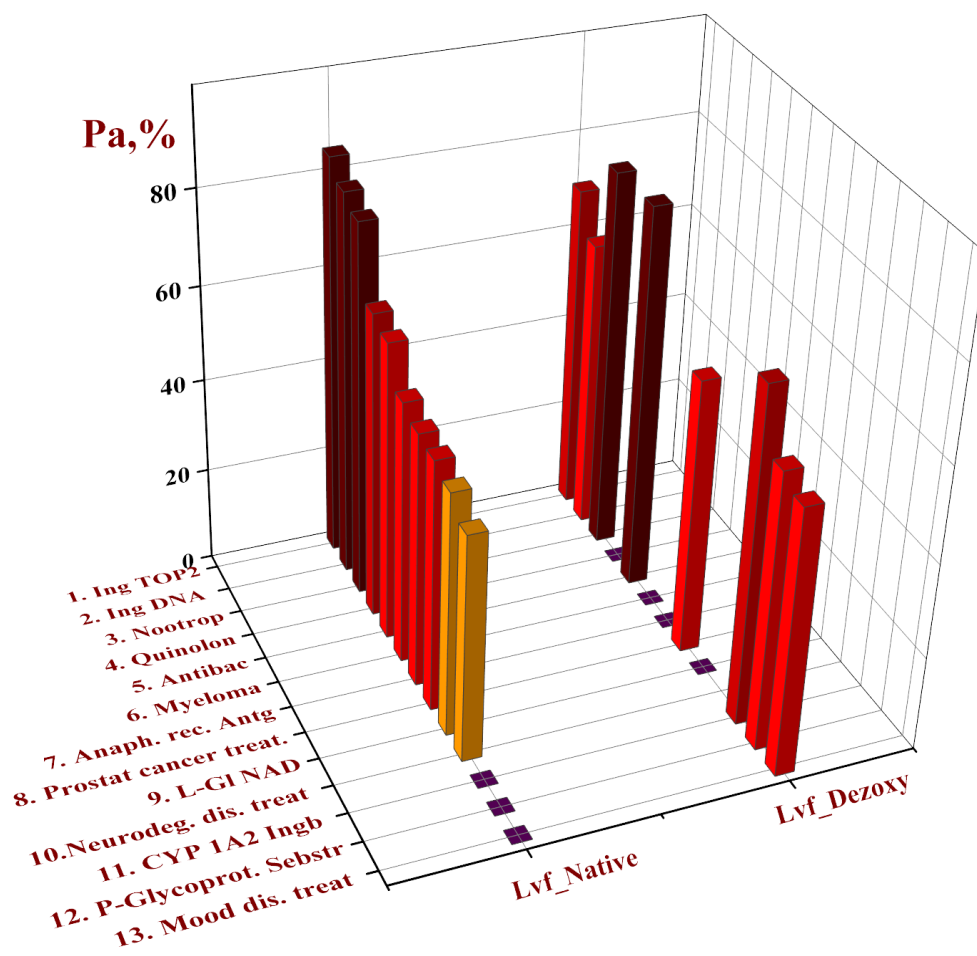

Figure S3: The Pa for the RMS of.

## Supplementary Material

### LFXbasic

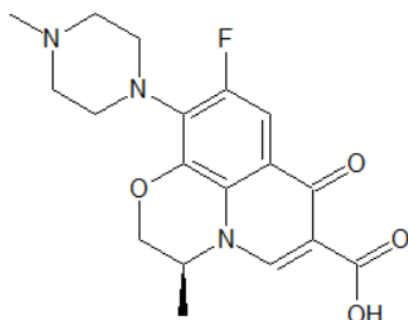

☐ All ☒ Pa>Pi ☐ Pa>0,3 ☐ Pa>0,7

| Pa    | Pi    | Activity                               |
|-------|-------|----------------------------------------|
| 0,851 | 0,003 | Topoisomerase II inhibitor             |
| 0,818 | 0,004 | DNA synthesis inhibitor                |
| 0,797 | 0,018 | Nootropic                              |
| 0,653 | 0,001 | Antibiotic Quinolone-like              |
| 0,636 | 0,007 | Antibacterial                          |
| 0,559 | 0,006 | Antineoplastic (multiple myeloma)      |
| 0,534 | 0,007 | Prostate cancer treatment              |
| 0,541 | 0,052 | Anaphylatoxin receptor antagonist      |
| 0,517 | 0,057 | Glutamate-5-semialdehyde dehydrogenase |

| Wiener -1.#J | Rouvray -1.#J | Balaban -1.#J | Detour -1.#J | Electropy -1.#J |
|--------------|---------------|---------------|--------------|-----------------|
| 597.6840     | 1193.6060     | 2.0036        | 3227.9390    | 28.7045         |

### LFXwithout piperazine

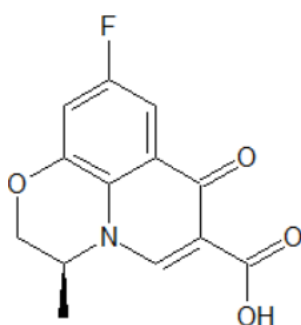

☐ All ☒ Pa>Pi ☐ Pa>0,3 ☐ Pa>0,7

| Pa    | Pi    | Activity                                         |
|-------|-------|--------------------------------------------------|
| 0,839 | 0,001 | Antibacterial, ophthalmic                        |
| 0,756 | 0,003 | Topoisomerase II inhibitor                       |
| 0,753 | 0,027 | Nootropic                                        |
| 0,634 | 0,008 | DNA synthesis inhibitor                          |
| 0,625 | 0,037 | Glutamate-5-semialdehyde dehydrogenase inhibitor |
| 0,599 | 0,013 | Antiinfective                                    |
| 0,575 | 0,010 | Antibacterial                                    |
| 0,513 | 0,014 | P-glycoprotein substrate                         |

| Wiener -1.#J | Rouvray -1.#J | Balaban -1.#J | Detour -1.#J | Electropy -1.#J |
|--------------|---------------|---------------|--------------|-----------------|
| 234.3270     | 467.1780      | 2.4284        | 1480.9860    | 19.6346         |

### LFXno COOH

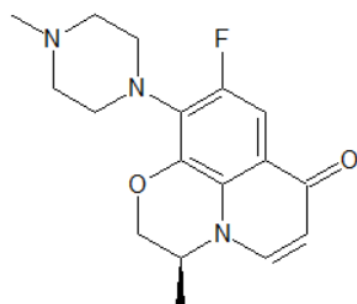

☐ All ☒ Pa>Pi ☐ Pa>0,3 ☐ Pa>0,7

| Pa    | Pi    | Activity                   |
|-------|-------|----------------------------|
| 0,818 | 0,001 | Antibacterial, ophthalmic  |
| 0,811 | 0,015 | Nootropic                  |
| 0,716 | 0,004 | CYP1A2 inhibitor           |
| 0,699 | 0,003 | Topoisomerase II inhibitor |
| 0,695 | 0,005 | CYP1A inhibitor            |
| 0,620 | 0,009 | DNA synthesis inhibitor    |
| 0,589 | 0,005 | Prostate cancer treatment  |
| 0,591 | 0,009 | P-glycoprotein substrate   |
| 0,568 | 0,015 | Mood disorders treatment   |

| Wiener -1.#J | Rouvray -1.#J | Balaban -1.#J | Detour -1.#J | Electropy -1.#J |
|--------------|---------------|---------------|--------------|-----------------|
| 427.3360     | 853.4100      | 1.9777        | 2478.9310    | 22.5301         |

## Supplementary Material

### LFXnoF

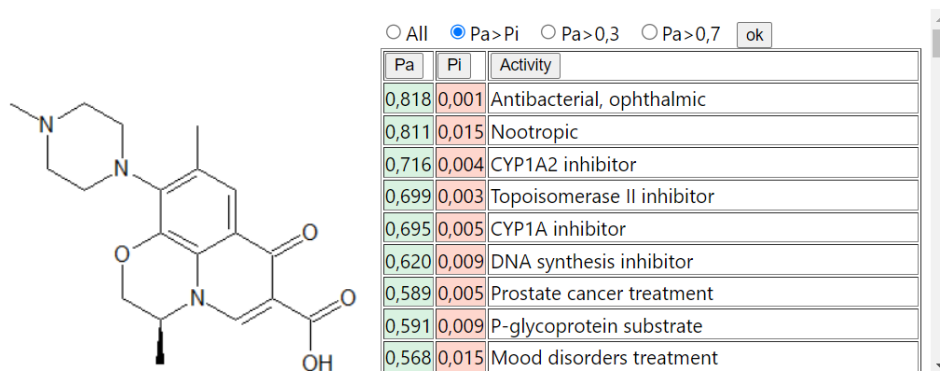

| Wiener -1. #J | Rouvray -1. #J | Balaban -1. #J | Detour -1. #J | Electropy -1. #J |
|---------------|----------------|----------------|---------------|------------------|
| 601.5135      | 1201.5980      | 1.9925         | 3236.0975     | 24.4566          |

### LFXnaked

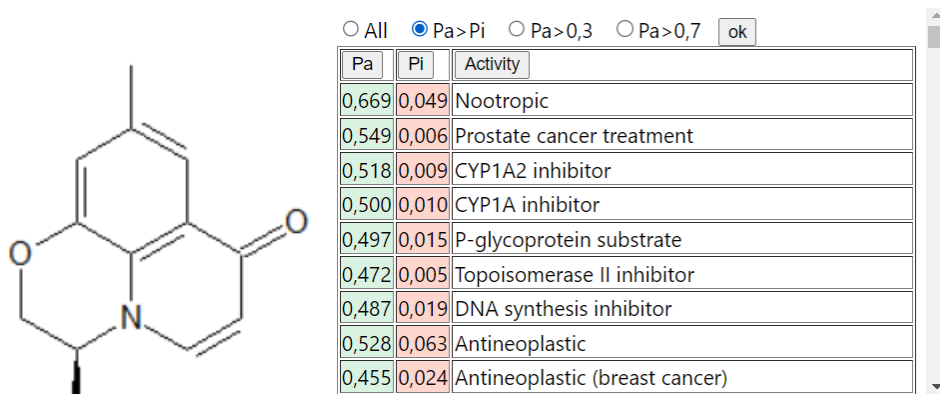

| Wiener -1. #J | Rouvray -1. #J | Balaban -1. #J | Detour -1. #J | Electropy -1. #J |
|---------------|----------------|----------------|---------------|------------------|
| 147.1820      | 293.7210       | 2.3744         | 1023.8795     | 10.7142          |

### LFXtotally naked

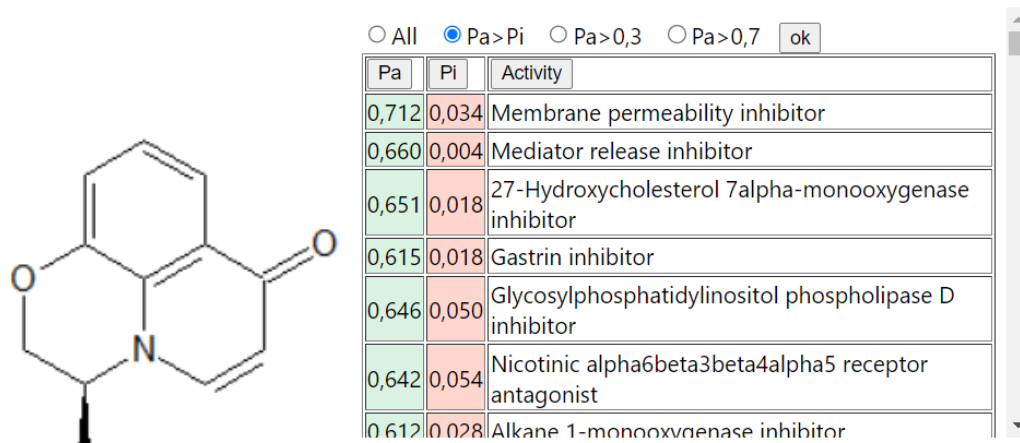

| Wiener -1. #J | Rouvray -1. #J | Balaban -1. #J | Detour -1. #J | Electropy -1. #J |
|---------------|----------------|----------------|---------------|------------------|
| 121.8700      | 243.0970       | 2.3729         | 887.6155      | 10.4147          |

**Scheme S1:** PASS (Prediction of Activity Spectra for Substances) Online for RMS and PMS of LvF

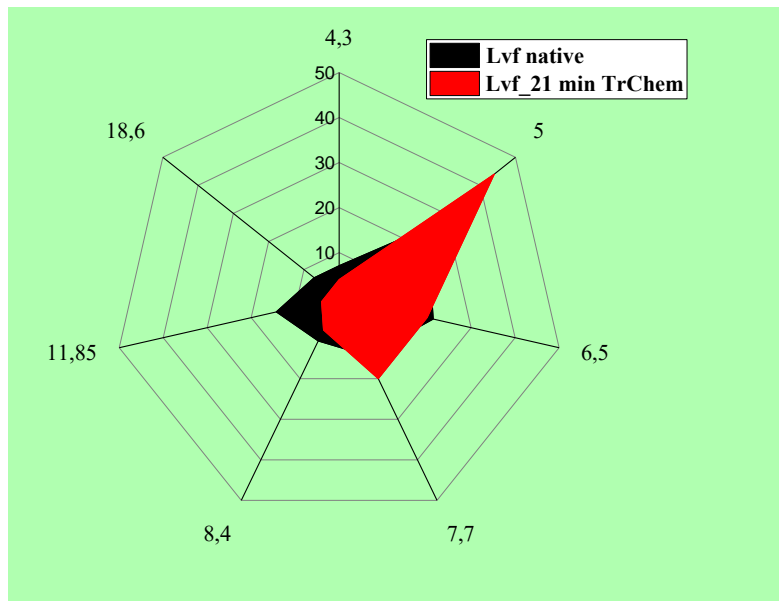

**Figure S4:** Optical Microscope granulometry of RMS of Lvf.
